# Supplementary material for: Accessory Gvp Proteins Form a Complex During Gas Vesicle Formation of Haloarchaea
Source: PubMed Central journal article supplement (PMC7688916; doi:10.3389/fmicb.2020.610179), 2020-11-12
Supplement: Data_Sheet_1.pdf [file Data_Sheet_1.pdf]

## Supplementary Figures

### Accessory Gvp Proteins Form a Complex During Gas Vesicle Formation of Haloarchaea

*Kerstin Völkner, Alisa Jost and Felicitas Pfeifer*

Microbiology and Archaea, Department of Biology, Technical University Darmstadt, Darmstadt, Germany

**Supplementary Table 1.** Oligonucleotides used in this study.

| Name                                      | Oligonucleotide sequence (5' – 3')*                |
|-------------------------------------------|----------------------------------------------------|
| <b><i>Split-GFP analysis</i></b>          |                                                    |
| 5'-PciI-pG                                | tccgag <b>acatgt</b> tcatcatagacgatctc             |
| 5'-BamHI-pG                               | aggtaa <b>ggatcc</b> atgttcatcatagacgatctcttcgtg   |
| 3'-BlnI-pG                                | tggtgtt <b>gctcage</b> ttatttctgacctccatgcg        |
| 3'-BlnI-pGΔStop                           | tggtgtt <b>gctcage</b> ga ttcttgacctccatgcg        |
| 3'-BamHI-pGΔStop                          | aggtaa <b>ggatcc</b> c ttcttgacctccatgcg           |
| 3'-KpnI-pG                                | agttct <b>ggtacc</b> ttatttctgacctccatgcgg         |
| 5'-BspHI-pI                               | tggtgtt <b>tcatga</b> gcgacaaacaacagcaaaaacacaag   |
| 5'-BamHI-pI                               | tggtgtt <b>ggatcc</b> atgagcgcacaaacaacagcaaaaacac |
| 3'-BlnI-pI                                | attc <b>gctcage</b> tcacctcgtcctcagtggg            |
| 3'-BlnI-pIΔStop                           | tggtgtt <b>gctcage</b> ga ctcacgttcacctcgtcctc     |
| 3'-BamHI-pIΔStop                          | aggtaa <b>ggatcc</b> c ctcacgttcacctcgtcctcag      |
| 3'-KpnI-pI                                | agttct <b>ggtacc</b> tcactcatcgttcacctcgtcctc      |
| 5'-NcoI-pK                                | acacga <b>ccatgg</b> aactagcactcgcgcgac            |
| 5'-BamHI-pK                               | aggtaa <b>ggatcc</b> atggaactagcactcgcgcgacg       |
| 3'-BlnI-pK                                | tggtgtt <b>gctcage</b> tcatacgtcatcagctgggattc     |
| 3'-BlnI-pKΔStop                           | tggtgtt <b>gctcage</b> ga tacgtcatcagctgggattc     |
| 3'-BamHI-pKΔStop                          | aggtaa <b>ggatcc</b> c tacgtcatcagctgggattc        |
| 3'-KpnI-pK                                | attc <b>ggtacc</b> tcatacgtcatcagctgggattcc        |
| 5'-NcoI-pA                                | tggtgtt <b>ccatgg</b> cgcaaccagattcttc             |
| 5'-BamHI-pA                               | aggtaa <b>ggatcc</b> atggcgcacaccagattc            |
| 3'-BlnI-pA                                | tggtgtt <b>gctcage</b> tcaggcctcgggtg              |
| 3'-BlnI-pAΔStop                           | tggtgtt <b>gctcage</b> ga ggccctcgggtgc            |
| 3'-BamHI-pAΔStop                          | agttct <b>ggatcc</b> c ggccctcgggtg                |
| 3'-KpnI-pA                                | agttct <b>ggtacc</b> tcaggcctcgggtgc               |
| <b><i>split-GFP – p-gvpA variants</i></b> |                                                    |
| 3'-BlnI-pAa1+Stop                         | attc <b>gctcage</b> tca aacgacacctttgtctagtacac    |
| 3'-BlnI-pAa1                              | attc <b>gctcage</b> ga aacgacacctttgtctagtacac     |
| 3'-BamHI-pA_a1                            | agttct <b>ggatcc</b> c aacgacacctttgtctagtacac     |
| 3'-KpnI-pA_a1+Stop                        | attc <b>ggtacc</b> tca aacgacacctttgtctagtacac     |

|                       |                                         |
|-----------------------|-----------------------------------------|
| 5'-NcoI-pA_20-47      | attc <b>ccatgg</b> gtgtcgttggacgtgtg    |
| 5'-BamHI-pA_20-47     | attc <b>ggatcc</b> atg ggtgtcgttggacgtg |
| 3'-BlnI-pA_20-47+Stop | attc <b>gctcage</b> tca cgaggcggcgacg   |
| 3'-BlnI-pA_20-47      | attc <b>gctcage</b> ga cgaggcggcgacg    |
| 3'-BamHI-pA_20-47     | attc <b>ggatcc</b> c cgaggcggcgacg      |
| 3'-KpnI-pA_20-47+Stop | attc <b>ggtacc</b> tca cgaggcggcgacg    |
| 5'-NcoI-pA_a2         | attc <b>ccatgg</b> tcgccgcctcggtg       |
| 5'-BamHI-pA_a2        | attc <b>ggatcc</b> atg gtcgccgcctcggtg  |

### ***Pull-down analyses using CBD***

|             |                                                     |
|-------------|-----------------------------------------------------|
| 5'-BspHI-pF | acacga <b>tcatga</b> ctgagaacctatacacatacgggtatcatc |
| 5'-XbaI-pF  | agttct <b>tctaga</b> atgactgagaacctatacacatacgg     |
| 3'-BamHI-pF | aggtcaa <b>ggatcc</b> cc tcggcctcctgttgctg          |
| 3'-KpnI-pF  | agttct <b>ggtacc</b> ttatcggcctcctgttgctgttc        |
| 5'-XbaI-pG  | agttct <b>tctaga</b> atgttcatcatagacgatctcttcg      |
| 3'-KpnI-pG  | agttct <b>ggtacc</b> ttatttcttgacctccatgcgg         |
| 5'-XbaI-pH  | agttct <b>tctaga</b> atggttcccgcacgaaaacg           |
| 3'-BsrGI-pH | attc <b>tgtaca</b> tcattgtgattcacctccatcg           |
| 5'-XbaI-pI  | agttct <b>tctaga</b> atgagcgacaacaacagcaaaaac       |
| 3'-KpnI-pI  | agttct <b>ggtacc</b> tcactcatcgttcacctcgtctc        |
| 5'-XbaI-pJ  | agttct <b>tctaga</b> atgagtgaccccaaacggac           |
| 3'-KpnI-pJ  | <b>ggtacc</b> tcatttggctcctccgctgac                 |
| 5'-XbaI-pK  | agttct <b>tctaga</b> atggaactagcactcgacgac          |
| 3'-KpnI-pK  | attc <b>ggtacc</b> tcatacgtcatcacgctgggattcc        |
| 5'-XbaI-pL  | agttct <b>tctaga</b> atgact gaccaccggcccag          |
| 3'-KpnI-pL  | agttct <b>ggtacc</b> ttatttaccatctctggcgcg          |
| 5'-XbaI-pM  | agttct <b>tctaga</b> atggagccaacaaaagacgag acac     |
| 3'-KpnI-pM  | agttct <b>ggtacc</b> tcagtcctctcgcggatc             |

---

\*restriction sites are marked in bold

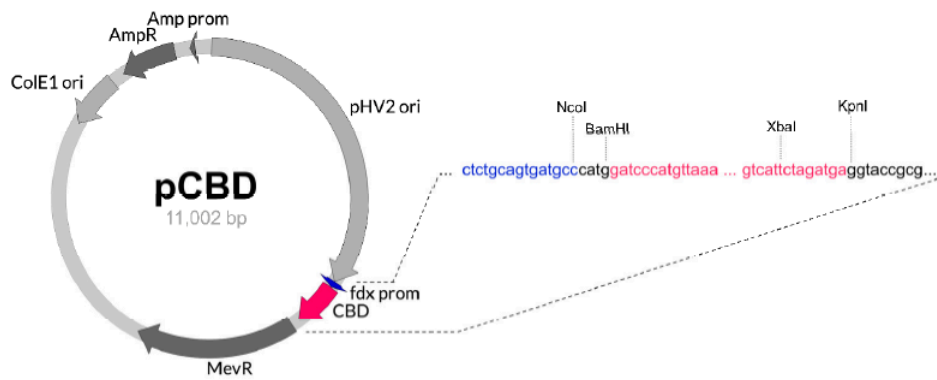

**Supplementary Figure 1.** Plasmid map of vector pCBD. The expression of ORF inserted is driven by the ferredoxin promoter (fdx prom). The DNA sequences up- and downstream of *cbd* (red arrow and sequence) are shown on the right including the restriction sites used for the fusion of the *gvp* reading frame either at the 5'-end of *cbd* (*Nco*I, *Bam*HI), or at the 3'-end (*Xba*I, *Kpn*I). The shuttle vector contains a mevinolin resistance gene (MevR) for selection in haloarchaea, and an ampicillin resistance gene (AmpR) for selection in *Escherichia coli*. The haloarchaeal origin of replication derives from the *Hfx. volcanii* plasmid pHV2 whereas the ColE1 ori is used in *E. coli*.

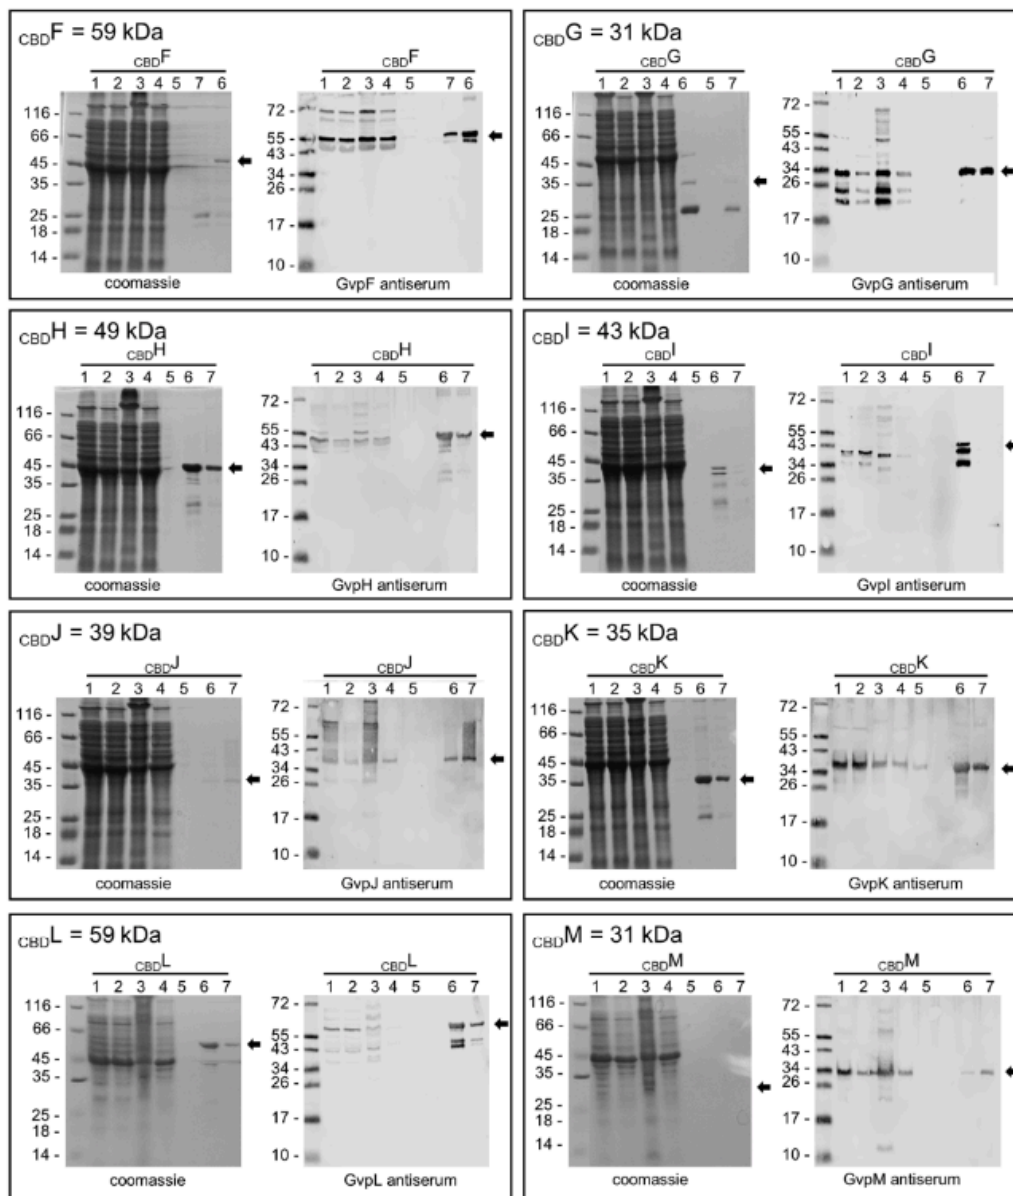

**Supplementary Figure 2.** Purification of  $CBD_X$  proteins using a cellulose matrix. In each case, 15  $\mu$ L of each protein fraction were separated by SDS-PAGE and the proteins stained by Coomassie blue (gel on the left). For Western analysis (blot on the right) the proteins were transferred to a PVDF membrane and incubated with the respective antiserum indicated underneath to detect the protein under investigation. A fluorophore-labelled secondary antibody (IRDye 800CW, Licor) was used for detection. The blots are inverted to black-white. The size markers on the left are in kDa. Arrows mark the position of the expected proteins. 1, cell lysate after sonication; 2, cell lysate after ultracentrifugation; 3, sediment after ultracentrifugation; 4, flow-through; 5, last wash fraction; 6, elution fraction 1; 7, elution fraction 2.

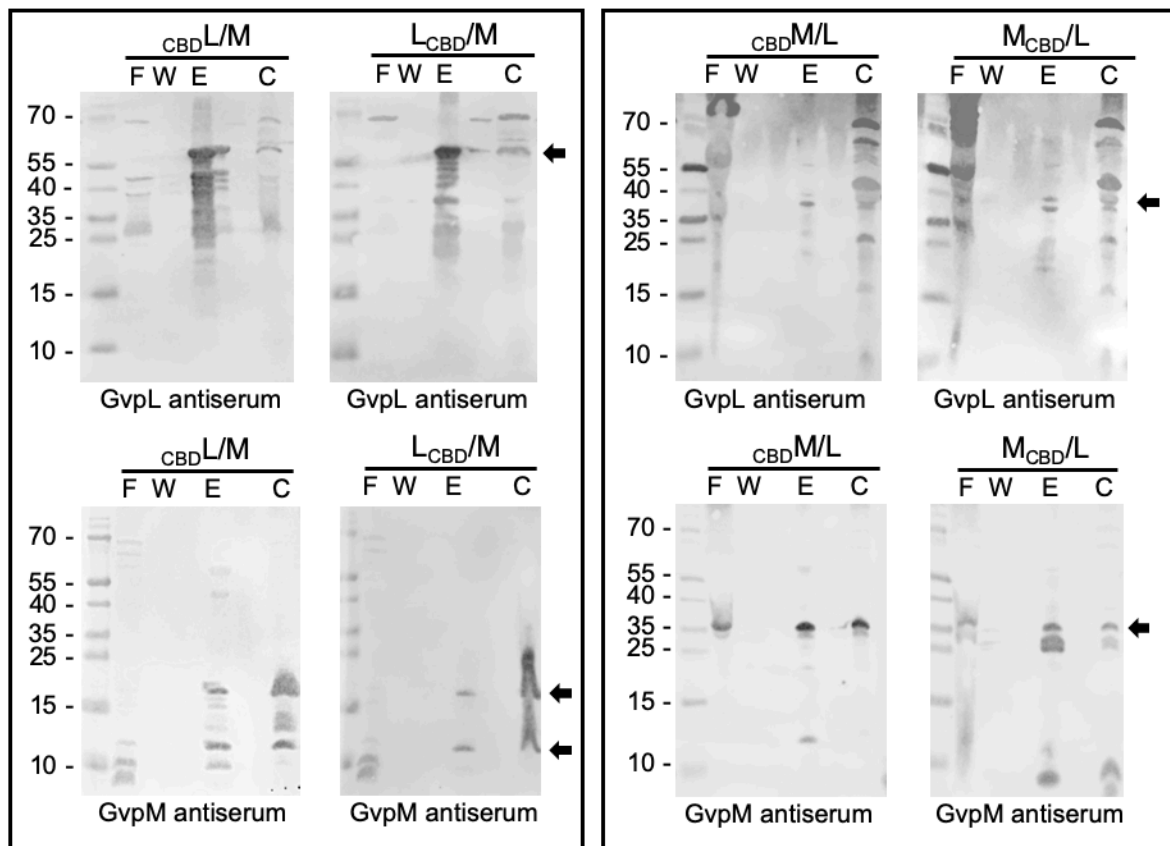

**Supplementary Figure 3.** Western analyses of pull-down assays to investigate the L/M interaction. The four combinations  $CBDL/M$ ,  $LCBD/M$ ,  $CBDM/L$  and  $MCBD/L$  were analyzed. 20  $\mu\text{g}$  of protein were applied in case of (F), flow-through; and (C), control (= lysate of the respective *Hfx. volcanii* transformant), and 15  $\mu\text{L}$  were applied in the case of the last wash fraction (W) and the elution fraction (E). The proteins were separated by SDS-PAGE, transferred to a PVDF membrane and incubated with the respective Gvp antiserum. The antiserum is marked on the bottom. To visualize the proteins, IRDye 800CW-labelled secondary antisera were used. The expected Gvp monomers (and in case of GvpM also the dimer) are marked by an arrow. The blots are inverted to black and white.

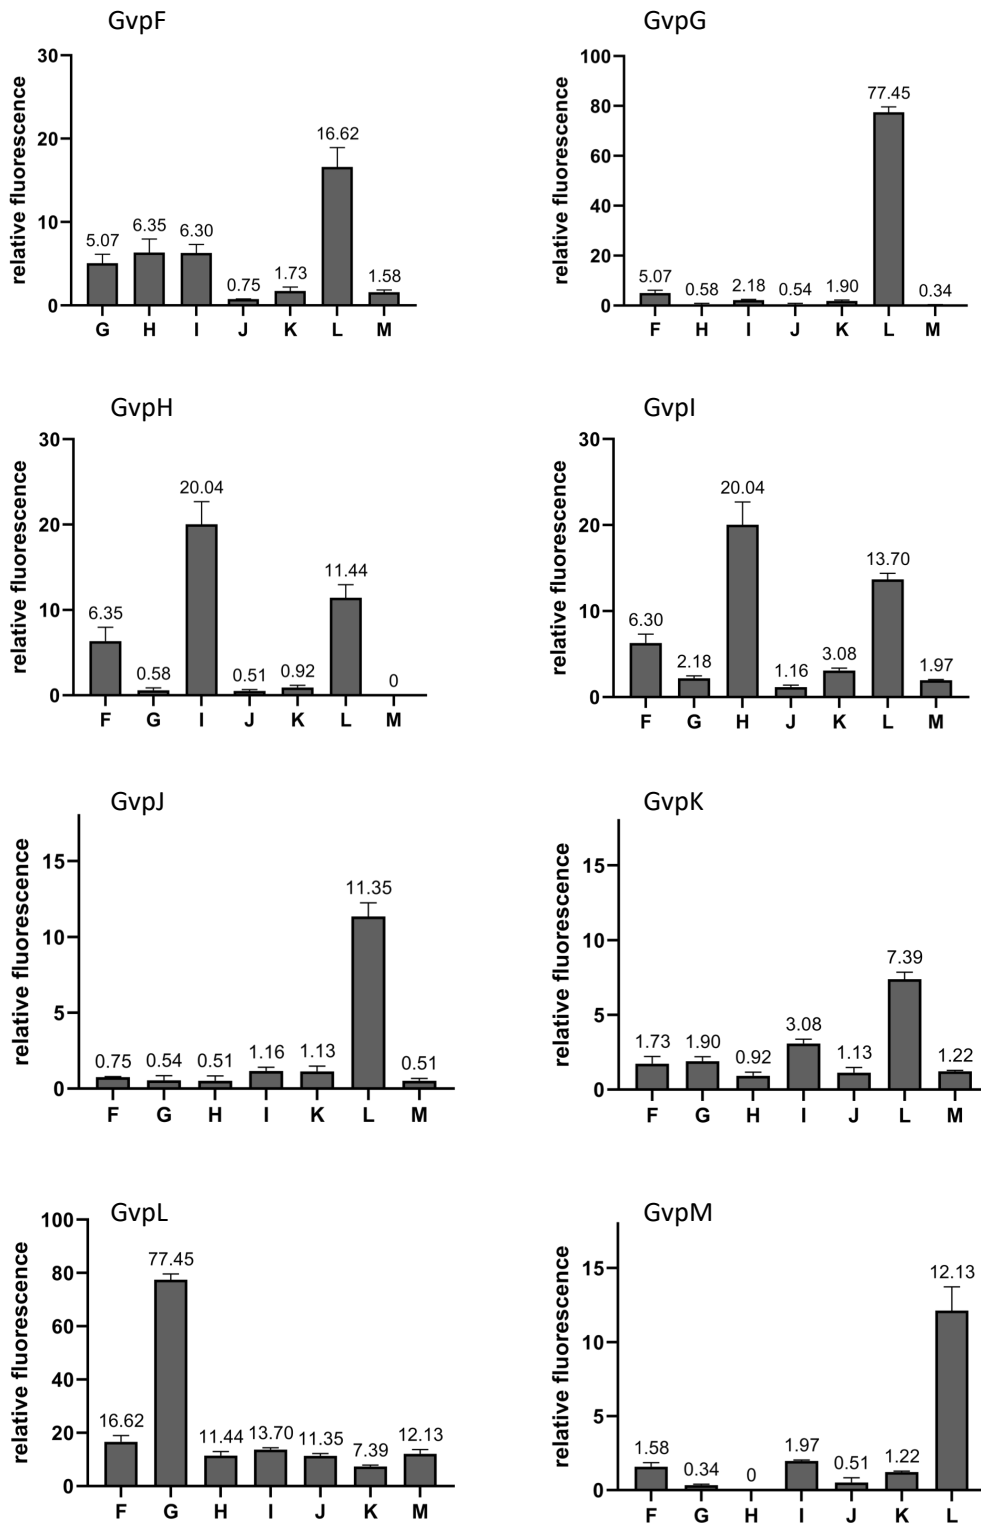

**Supplementary Figure 4.** Split-GFP analyses to study interactions of the accessory proteins. In each case, only the highest rf-value of the combinations tested is shown. The experimental data underlying these results are presented in supplemental Figure S5. The respective Gvp protein tested is marked on top, and the respective interaction partner on the bottom. The fluorescence was determined in LAU/mm<sup>2</sup>. The relative fluorescence, rf, was calculated as indicated in the Material and Methods section. The numbers indicate the highest rf-value determined for each combination. Two biological and three technical replicates were investigated in each case.

| transformant             | LAU/mm <sup>2</sup> | $\sigma$<br>(LAU/mm <sup>2</sup> ) | Relative<br>fluorescence<br>(rf) | transformant             | LAU/mm <sup>2</sup> | $\sigma$<br>(LAU/mm <sup>2</sup> ) | Relative<br>fluorescence<br>(rf) |
|--------------------------|---------------------|------------------------------------|----------------------------------|--------------------------|---------------------|------------------------------------|----------------------------------|
| <b>control</b>           |                     |                                    |                                  | <b>GvpG interactions</b> |                     |                                    |                                  |
| WR340                    | 17,066              | 1,687                              | 0.00                             | NG Hc                    | 17,038              | 2,091                              | 0.10                             |
| <b>GvpF interactions</b> |                     |                                    |                                  | cH                       | 10,528              | 1,983                              | 0.00                             |
| NGF Gc                   | 87,165              | 12,609                             | 3.91                             | GN Hc                    | 20,611              | 3,106                              | 0.30                             |
| cG                       | 11,884              | 621                                | 0.00                             | cH                       | 9,237               | 1,080                              | 0.00                             |
| FN Gc                    | 107,895             | 17,121                             | 1.06                             | cG HN                    | 10,196              | 2,690                              | 0.00                             |
| cG                       | 12,481              | 1,261                              | 0.00                             | NH                       | 10,583              | 1,526                              | 0.00                             |
| cF GN                    | 11,803              | 391                                | 0.00                             | Gc HN                    | 25,209              | 4,254                              | 0.58                             |
| NG                       | 8,557               | 781                                | 0.00                             | NH                       | 21,067              | 1,111                              | 0.32                             |
| FC GN                    | 83,692              | 2,438                              | 0.15                             | NG Ic                    | 35,901              | 1,329                              | 0.72                             |
| NG                       | 64,838              | 5,710                              | 0.35                             | cJ                       | 16,309              | 1,628                              | 0.00                             |
| NGF Hc                   | 123,515             | 24,068                             | 5.95                             | GN Ic                    | 40,554              | 1,630                              | 0.95                             |
| cH                       | 11,533              | 850                                | 0.00                             | cJ                       | 16,155              | 2,636                              | 0.00                             |
| FN Hc                    | 130,511             | 26,133                             | 6.35                             | cG In                    | 18,190              | 636                                | 0.00                             |
| cH                       | 17,675              | 1,570                              | 0.04                             | Nl                       | 15,385              | 334                                | 0.00                             |
| cF HN                    | 13,704              | 869                                | 0.00                             | Gc In                    | 41,093              | 5,334                              | 0.97                             |
| NH                       | 12,312              | 899                                | 0.00                             | Nl                       | 66,154              | 5,393                              | 2.18                             |
| FC HN                    | 101,301             | 8,940                              | 4.70                             | NG Jc                    | 26,399              | 3,803                              | 0.27                             |
| NH                       | 73,418              | 3,017                              | 3.13                             | cJ                       | 13,521              | 2,029                              | 0.00                             |
| NGF Ic                   | 109,826             | 16,264                             | 5.10                             | GN Jc                    | 32,074              | 5,853                              | 0.54                             |
| cJ                       | 11,082              | 555                                | 0.00                             | cJ                       | 12,786              | 1,918                              | 0.00                             |
| FN Ic                    | 129,765             | 16,305                             | 6.30                             | cG JN                    | 12,732              | 2,657                              | 0.00                             |
| cJ                       | 10,787              | 909                                | 0.00                             | NJ                       | 12,236              | 1,238                              | 0.00                             |
| cF In                    | 10,213              | 2,586                              | 0.00                             | Gc JN                    | 16,635              | 2,669                              | 0.00                             |
| Nl                       | 10,532              | 881                                | 0.00                             | NJ                       | 18,960              | 4,425                              | 0.06                             |
| FC In                    | 112,863             | 4,033                              | 5.35                             | NG Kc                    | 24,821              | 4,076                              | 0.23                             |
| Nl                       | 127,148             | 9,485                              | 6.16                             | cK                       | 15,038              | 1,402                              | 0.00                             |
| NGF Jc                   | 28,027              | 565                                | 0.75                             | GN Kc                    | 21,793              | 3,924                              | 0.11                             |
| cJ                       | 9,612               | 1,087                              | 0.00                             | cK                       | 13,127              | 1,348                              | 0.00                             |
| FN Jc                    | 24,642              | 943                                | 0.54                             | cG KN                    | 15,293              | 2,526                              | 0.00                             |
| cJ                       | 9,073               | 1,136                              | 0.00                             | NK                       | 17,784              | 2,230                              | 0.00                             |
| cF JN                    | 11,566              | 402                                | 0.00                             | Gc KN                    | 19,943              | 1,215                              | 0.01                             |
| NJ                       | 8,361               | 1,287                              | 0.00                             | NK                       | 60,428              | 5,626                              | 1.90                             |
| FC JN                    | 13,853              | 1,428                              | 0.00                             | NG Lc                    | 35,575              | 718                                | 1.25                             |
| NJ                       | 15,429              | 2,314                              | 0.05                             | cL                       | 1,239,724           | 36,995                             | 77.45                            |
| NGF Kc                   | 32,122              | 4,565                              | 1.01                             | GN Lc                    | 19,318              | 1,256                              | 0.22                             |
| cK                       | 10,029              | 1,748                              | 0.00                             | cL                       | 291,817             | 42,477                             | 17.47                            |
| FN Kc                    | 38,081              | 13,976                             | 1.38                             | cG LN                    | 31,982              | 2,466                              | 1.02                             |
| cK                       | 8,776               | 1,761                              | 0.00                             | NL                       | 39,238              | 2,815                              | 1.48                             |
| cF KN                    | 9,564               | 217                                | 0.00                             | Gc LN                    | 90,246              | 11,496                             | 4.71                             |
| NK                       | 7,647               | 1,932                              | 0.00                             | NL                       | 429,801             | 30,057                             | 26.20                            |
| FC KN                    | 13,826              | 390                                | 0.00                             | NG Mc                    | 13,228              | 838                                | 0.01                             |
| NK                       | 43,619              | 7,062                              | 1.73                             | cM                       | 12,356              | 657                                | 0.00                             |
| NGF Lc                   | 181,946             | 12,207                             | 10.65                            | GN Mc                    | 18,243              | 3,416                              | 0.31                             |
| cL                       | 16,733              | 1,502                              | 0.08                             | cM                       | 12,417              | 947                                | 0.00                             |
| FN Lc                    | 210,293             | 4,889                              | 12.51                            | cG MN                    | 11,020              | 1,717                              | 0.00                             |
| cL                       | 21,354              | 2,026                              | 0.36                             | NM                       | 10,889              | 447                                | 0.00                             |
| cF LN                    | 15,145              | 1,594                              | 0.05                             | Gc MN                    | 18,661              | 581                                | 0.34                             |
| NL                       | 24,034              | 5,085                              | 0.53                             | NM                       | 16,982              | 1,264                              | 0.22                             |
| FC LN                    | 39,902              | 1,176                              | 1.57                             |                          |                     |                                    |                                  |
| NL                       | 273,631             | 15,616                             | 16.62                            |                          |                     |                                    |                                  |

*continued*

| transformant             |                | LAU/mm <sup>2</sup> | $\sigma$<br>(LAU/mm <sup>2</sup> ) | Relative<br>fluorescence<br>(rf) | transformant             |                | LAU/mm <sup>2</sup> | $\sigma$<br>(LAU/mm <sup>2</sup> ) | Relative<br>fluorescence<br>(rf) |
|--------------------------|----------------|---------------------|------------------------------------|----------------------------------|--------------------------|----------------|---------------------|------------------------------------|----------------------------------|
| <b>GvpH interactions</b> |                |                     |                                    |                                  | nI                       | Lc             | 265,687             | 11,216                             | 13.70                            |
| nH                       | lc             | 79,625              | 4,381                              | 4.04                             | cL                       |                | 27,854              | 1,437                              | 0.54                             |
|                          | cl             | 15,828              | 1,533                              | 0.05                             | ln                       | Lc             | 217,188             | 20,733                             | 11.02                            |
| H <sub>N</sub>           | lc             | 111,516             | 9,401                              | 6.06                             | cL                       |                | 19,779              | 1,831                              | 0.11                             |
|                          | cl             | 15,342              | 441                                | 0.00                             | cl                       | L <sub>N</sub> | 15,057              | 963                                | 0.00                             |
| cH                       | ln             | 17,990              | 1,491                              | 0.14                             | nL                       |                | 24,251              | 2,168                              | 0.34                             |
|                          | nI             | 17,653              | 1,952                              | 0.13                             | lc                       | L <sub>N</sub> | 30,278              | 3,556                              | 0.68                             |
| H <sub>C</sub>           | ln             | 215,399             | 7,709                              | 12.63                            | nL                       |                | 14,127              | 1,057                              | 0.00                             |
|                          | nI             | 332,556             | 38,157                             | 20.04                            |                          |                |                     |                                    |                                  |
|                          |                |                     |                                    |                                  | nI                       | M <sub>C</sub> | 9,736               | 747                                | 0.00                             |
| nH                       | J <sub>C</sub> | 20,514              | 4,651                              | 0.30                             | cM                       |                | 10,929              | 469                                | 0.00                             |
|                          | cJ             | 13,485              | 947                                | 0.00                             | ln                       | M <sub>C</sub> | 9,315               | 436                                | 0.00                             |
| H <sub>N</sub>           | J <sub>C</sub> | 23,868              | 2,257                              | 0.51                             | cM                       |                | 10,898              | 762                                | 0.00                             |
|                          | cJ             | 15,275              | 2,800                              | 0.07                             | cl                       | M <sub>N</sub> | 10,807              | 456                                | 0.00                             |
| cH                       | J <sub>N</sub> | 12,442              | 1,006                              | 0.00                             | nM                       |                | 11,605              | 747                                | 0.00                             |
|                          | nJ             | 12,598              | 737                                | 0.00                             | lc                       | M <sub>N</sub> | 25,874              | 4,482                              | 0.71                             |
| H <sub>C</sub>           | J <sub>N</sub> | 16,434              | 2,392                              | 0.09                             | nM                       |                | 44,890              | 890                                | 1.97                             |
|                          | nJ             | 17,174              | 1,350                              | 0.09                             |                          |                |                     |                                    |                                  |
| <b>GvpJ interactions</b> |                |                     |                                    |                                  |                          |                |                     |                                    |                                  |
| nH                       | K <sub>C</sub> | 28,049              | 2,887                              | 0.28                             | nJ                       | K <sub>C</sub> | 20,329              | 1,763                              | 0.12                             |
|                          | cK             | 14,560              | 580                                | 0.00                             | cK                       |                | 13,329              | 474                                | 0.00                             |
| H <sub>N</sub>           | K <sub>C</sub> | 28,790              | 4,181                              | 0.31                             | J <sub>N</sub>           | K <sub>C</sub> | 15,603              | 4,395                              | 0.06                             |
|                          | cK             | 14,470              | 1,760                              | 0.00                             | cK                       |                | 13,848              | 562                                | 0.00                             |
| cH                       | K <sub>N</sub> | 14,173              | 1,091                              | 0.00                             | cl                       | K <sub>N</sub> | 15,275              | 1,174                              | 0.00                             |
|                          | nK             | 14,915              | 715                                | 0.00                             | nK                       |                | 18,514              | 5,587                              | 0.11                             |
| H <sub>C</sub>           | K <sub>N</sub> | 17,426              | 1,006                              | 0.00                             | J <sub>C</sub>           | K <sub>N</sub> | 19,308              | 1,414                              | 0.07                             |
|                          | nK             | 42,257              | 4,777                              | 0.92                             | nK                       |                | 38,556              | 5,618                              | 1.13                             |
|                          |                |                     |                                    |                                  | nJ                       | L <sub>C</sub> | 45,961              | 2,668                              | 1.20                             |
| nH                       | L <sub>C</sub> | 202,765             | 12,468                             | 8.23                             | cL                       |                | 15,806              | 1,480                              | 0.00                             |
|                          | cL             | 18,806              | 883                                | 0.00                             | J <sub>N</sub>           | L <sub>C</sub> | 57,894              | 814                                | 1.77                             |
| H <sub>N</sub>           | L <sub>C</sub> | 273,308             | 30,464                             | 11.44                            | cL                       |                | 15,955              | 2,645                              | 0.00                             |
|                          | cL             | 20,533              | 1,778                              | 0.01                             | cl                       | L <sub>N</sub> | 13,896              | 707                                | 0.00                             |
| cH                       | L <sub>N</sub> | 14,659              | 2,056                              | 0.00                             | nL                       |                | 28,710              | 7,991                              | 0.37                             |
|                          | nL             | 21,167              | 923                                | 0.01                             | J <sub>C</sub>           | L <sub>N</sub> | 80,039              | 64,248                             | 2.83                             |
| H <sub>C</sub>           | L <sub>N</sub> | 46,774              | 7,154                              | 1.13                             | nL                       |                | 258,153             | 17,047                             | 11.35                            |
|                          | nL             | 267,281             | 38,757                             | 11.17                            |                          |                |                     |                                    |                                  |
| <b>GvpI interactions</b> |                |                     |                                    |                                  | <b>GvpK interactions</b> |                |                     |                                    |                                  |
| nI                       | J <sub>C</sub> | 47,459              | 4,718                              | 1.16                             | nK                       | L <sub>C</sub> | 161,909             | 12,313                             | 6.75                             |
|                          | cJ             | 18,000              | 2,048                              | 0.00                             | cL                       |                | 18,642              | 577                                | 0.00                             |
| ln                       | J <sub>C</sub> | 42,790              | 11,595                             | 0.95                             | K <sub>N</sub>           | L <sub>C</sub> | 43,234              | 3,570                              | 1.07                             |
|                          | cJ             | 15,340              | 2,257                              | 0.00                             | cL                       |                | 13,152              | 643                                | 0.00                             |
| cl                       | J <sub>N</sub> | 16,641              | 2,873                              | 0.01                             | cK                       | L <sub>N</sub> | 13,565              | 3,427                              | 0.00                             |
|                          | nJ             | 16,523              | 3,415                              | 0.00                             | nL                       |                | 21,653              | 502                                | 0.04                             |
| lc                       | J <sub>N</sub> | 20,869              | 976                                | 0.00                             | K <sub>C</sub>           | L <sub>N</sub> | 58,646              | 5,108                              | 1.81                             |
|                          | nJ             | 28,206              | 5,405                              | 0.28                             | nL                       |                | 175,356             | 8,856                              | 7.39                             |
|                          |                |                     |                                    |                                  |                          |                |                     |                                    |                                  |
| nI                       | K <sub>C</sub> | 73,778              | 4,705                              | 3.08                             | nK                       | M <sub>C</sub> | 14,160              | 601                                | 0.17                             |
|                          | cK             | 15,528              | 2,365                              | 0.01                             | cM                       |                | 11,496              | 909                                | 0.01                             |
| ln                       | K <sub>C</sub> | 67,321              | 2,123                              | 2.73                             | K <sub>N</sub>           | M <sub>C</sub> | 13,762              | 599                                | 0.14                             |
|                          | cK             | 13,646              | 7,988                              | 0.00                             | cM                       |                | 10,704              | 500                                | 0.00                             |
| cl                       | K <sub>N</sub> | 12,086              | 719                                | 0.00                             | cK                       | M <sub>N</sub> | 9,237               | 1,112                              | 0.00                             |
|                          | nK             | 13,526              | 708                                | 0.00                             | nM                       |                | 12,428              | 1,471                              | 0.07                             |
| lc                       | K <sub>N</sub> | 15,761              | 1,798                              | 0.00                             | K <sub>C</sub>           | M <sub>N</sub> | 14,730              | 752                                | 0.22                             |
|                          | nK             | 14,970              | 2,339                              | 0.00                             | nM                       |                | 26,819              | 717                                | 1.22                             |

**Supplementary Figure 5.** Split-GFP analyses investigating pairwise interactions of the accessory Gvp. The fluorescence was measured in LAU/mm<sup>2</sup> and the relative fluorescence was calculated according to Winter et al. (2018). The GvpL and GvpM interactions have been published already (Winter et al., 2018).



| transformant             |    | LAU/mm <sup>2</sup> | $\sigma$<br>(LAU/mm <sup>2</sup> ) | Relative<br>fluorescence<br>(rf) | transformant                          |          | LAU/mm <sup>2</sup> | $\sigma$<br>(LAU/mm <sup>2</sup> ) | Relative<br>fluorescence<br>(rf) |
|--------------------------|----|---------------------|------------------------------------|----------------------------------|---------------------------------------|----------|---------------------|------------------------------------|----------------------------------|
| <b>GvpA interactions</b> |    |                     |                                    |                                  | NA                                    | LC       | 60,119              | 1,419                              | 1.55                             |
| NA                       | FC | 80,483              | 8,502                              | 2.26                             |                                       | cL       | 18,841              | 1,281                              | 0.00                             |
|                          | cF | 20,992              | 2,000                              | 0.00                             | AN                                    | LC       | 27,252              | 1,212                              | 0.16                             |
| AN                       | FC | 339,947             | 103,435                            | 12.70                            |                                       | cL       | 18,823              | 1,727                              | 0.00                             |
|                          | cF | 21,221              | 1,561                              | 0.00                             | CA                                    | LN       | 19,369              | 1,399                              | 0.00                             |
| CA                       | FN | 22,051              | 514                                | 0.00                             |                                       | nL       | 17,840              | 1,547                              | 0.00                             |
|                          | nF | 18,923              | 1,697                              | 0.00                             | Ac                                    | LN       | 21,534              | 673                                | 0.00                             |
| Ac                       | FN | 519,408             | 8,655                              | 20.08                            |                                       | nL       | 58,279              | 3,713                              | 1.47                             |
|                          | nF | 307,815             | 14,082                             | 11.49                            | NA                                    | Mc       | 17,676              | 1,043                              | 0.00                             |
| NA                       | Gc | 25,165              | 1,811                              | 0.04                             |                                       | cM       | 14,852              | 1,822                              | 0.00                             |
|                          | cG | 17,403              | 1,423                              | 0.00                             | AN                                    | Mc       | 17,103              | 940                                | 0.00                             |
| AN                       | Gc | 24,115              | 2,508                              | 0.03                             |                                       | cM       | 13,804              | 2,094                              | 0.00                             |
|                          | cG | 18,958              | 2,036                              | 0.00                             | CA                                    | MN       | 16,728              | 442                                | 0.00                             |
| CA                       | GN | 19,055              | 1,491                              | 0.00                             |                                       | nM       | 13,321              | 3,229                              | 0.00                             |
|                          | nG | 17,347              | 1,935                              | 0.00                             | Ac                                    | MN       | 16,873              | 768                                | 0.00                             |
| Ac                       | GN | 33,778              | 2,061                              | 0.37                             |                                       | nM       | 19,676              | 738                                | 0.00                             |
|                          | nG | 23,833              | 585                                | 0.00                             | <b>GvpF/GvpA variant interactions</b> |          |                     |                                    |                                  |
| NA                       | Hc | 29,749              | 4,899                              | 0.21                             | NF                                    | A1-22c   | 883,501             | 17,024                             | 32.18                            |
|                          | cH | 19,855              | 2,103                              | 0.00                             |                                       | c A1-22  | 18,199              | 604                                | 0.00                             |
| AN                       | Hc | 24,780              | 2,196                              | 0.03                             | FN                                    | A1-22c   | 1,128,200           | 27,676                             | 41.37                            |
|                          | cH | 18,986              | 756                                | 0.00                             |                                       | c A1-22  | 17,209              | 739                                | 0.00                             |
| CA                       | HN | 19,831              | 2,188                              | 0.00                             | cF                                    | A1-22N   | 30,056              | 3,750                              | 0.14                             |
|                          | nH | 18,922              | 811                                | 0.00                             |                                       | n A1-22  | 28,858              | 737                                | 0.10                             |
| Ac                       | HN | 33,569              | 4,202                              | 0.36                             | Fc                                    | A1-22N   | 289,486             | 100,816                            | 9.87                             |
|                          | nH | 21,477              | 2,089                              | 0.00                             |                                       | n A1-22  | 276,399             | 23,581                             | 9.38                             |
| NA                       | Ic | 33,547              | 2,397                              | 0.70                             | NF                                    | A1-34c   | 900,212             | 28,863                             | 33.17                            |
|                          | cI | 19,385              | 888                                | 0.03                             |                                       | c A1-34  | 20,460              | 1,604                              | 0.00                             |
| AN                       | Ic | 24,592              | 1,373                              | 0.25                             | FN                                    | A1-34c   | 815,906             | 63,597                             | 29.97                            |
|                          | cI | 20,112              | 548                                | 0.04                             |                                       | c A1-34  | 21,191              | 652                                | 0.00                             |
| CA                       | IN | 19,994              | 767                                | 0.02                             | cF                                    | A1-34N   | 34,939              | 3,383                              | 0.33                             |
|                          | nI | 19,541              | 833                                | 0.02                             |                                       | n A1-34  | 34,686              | 2,653                              | 0.32                             |
| Ac                       | IN | 32,643              | 1,295                              | 0.65                             | Fc                                    | A1-34N   | 714,437             | 58,861                             | 26.12                            |
|                          | nI | 37,083              | 3,425                              | 0.88                             |                                       | n A1-34  | 574,039             | 54,316                             | 20.79                            |
| NA                       | Jc | 25,476              | 1,182                              | 0.29                             | NF                                    | A1-43c   | 414,464             | 30,090                             | 14.73                            |
|                          | cJ | 20,220              | 2,845                              | 0.10                             |                                       | c A1-43  | 30,311              | 683                                | 0.15                             |
| AN                       | Jc | 27,322              | 615                                | 0.38                             | FN                                    | A1-43c   | 621,524             | 30,005                             | 22.59                            |
|                          | cJ | 21,663              | 703                                | 0.10                             |                                       | c A1-43  | 31,363              | 1,009                              | 0.19                             |
| CA                       | JN | 21,452              | 571                                | 0.09                             | cF                                    | A1-43N   | 26,879              | 976                                | 0.00                             |
|                          | nJ | 22,067              | 2,247                              | 0.14                             |                                       | n A1-43  | 41,467              | 3,329                              | 0.41                             |
| Ac                       | JN | 26,490              | 1,987                              | 0.35                             | Fc                                    | A1-43N   | 441,419             | 37,389                             | 14.04                            |
|                          | nJ | 21,987              | 863                                | 0.11                             |                                       | n A1-43  | 949,021             | 61,828                             | 35.02                            |
| NA                       | Kc | 24,203              | 3,686                              | 0.22                             | NF                                    | A20-47c  | 17,076              | 1,178                              | 0.02                             |
|                          | cK | 18,545              | 1,584                              | 0.03                             |                                       | c A20-47 | 14,138              | 833                                | 0.00                             |
| AN                       | Kc | 20,151              | 1,560                              | 0.04                             | FN                                    | A20-47c  | 18,422              | 428                                | 0.08                             |
|                          | cK | 18,825              | 2,477                              | 0.06                             |                                       | c A20-47 | 17,691              | 1,027                              | 0.00                             |
| CA                       | KN | 20,411              | 2,154                              | 0.06                             | cF                                    | A20-47N  | 17,002              | 1,769                              | 0.01                             |
|                          | nK | 20,693              | 1,826                              | 0.09                             |                                       | n A20-47 | 15,326              | 1,128                              | 0.00                             |
| Ac                       | KN | 23,525              | 2,914                              | 0.20                             | Fc                                    | A20-47N  | 19,097              | 1,239                              | 0.03                             |
|                          | nK | 26,653              | 613                                | 0.35                             |                                       | n A20-47 | 30,382              | 1,800                              | 0.61                             |

*continued*

| transformant        | LAU/mm <sup>2</sup> | $\sigma$<br>(LAU/mm <sup>2</sup> ) | Relative<br>fluorescence<br>(rf) |       |
|---------------------|---------------------|------------------------------------|----------------------------------|-------|
| NF                  | A44-76 <sub>C</sub> | 27,008                             | 1,236                            | 0.33  |
|                     | <sub>C</sub> A44-76 | 18,335                             | 1,202                            | 0.00  |
| F <sub>N</sub>      | A44-76 <sub>C</sub> | 29,068                             | 1,381                            | 0.44  |
|                     | <sub>C</sub> A44-76 | 18,231                             | 514                              | 0.00  |
| cF                  | A44-76 <sub>N</sub> | 20,533                             | 900                              | 0.03  |
|                     | <sub>N</sub> A44-76 | 23,737                             | 2,279                            | 0.17  |
| F <sub>C</sub>      | A44-76 <sub>N</sub> | 33,339                             | 1,651                            | 0.65  |
|                     | <sub>N</sub> A44-76 | 55,334                             | 7,966                            | 1.73  |
| F <sub>N</sub>      | A_D05A <sub>C</sub> | 145,274                            | 5,969                            | 10.23 |
|                     | A_A10S <sub>C</sub> | 205,825                            | 23,292                           | 14.91 |
|                     | A_E11A <sub>C</sub> | 149,443                            | 22,841                           | 11.18 |
|                     | A_D14A <sub>C</sub> | 176,443                            | 16,511                           | 13.38 |
|                     | A_R15A <sub>C</sub> | 78,324                             | 2,011                            | 5.38  |
|                     | A_L17A <sub>C</sub> | 173,576                            | 22,122                           | 13.50 |
|                     | A_K19A <sub>C</sub> | 129,419                            | 2,041                            | 9.81  |
|                     | A_K19D <sub>C</sub> | 76,832                             | 1,249                            | 5.42  |
|                     | A_G20A <sub>C</sub> | 58,340                             | 5,496                            | 3.87  |
|                     | A_G20D <sub>C</sub> | 23,935                             | 2,689                            | 1.00  |
|                     | A_D24A <sub>C</sub> | 48,123                             | 6,107                            | 2.72  |
|                     | A_D24R <sub>C</sub> | 109,337                            | 5,458                            | 7.45  |
|                     | A_D24Y <sub>C</sub> | 38,610                             | 3,054                            | 2.23  |
|                     | A_V25D <sub>C</sub> | 251,534                            | 5,568                            | 20.01 |
|                     | A_W26A <sub>C</sub> | 255,805                            | 19,554                           | 18.77 |
|                     | A_A27E <sub>C</sub> | 74,385                             | 2,394                            | 5.21  |
|                     | A_R28A <sub>C</sub> | 22,957                             | 1,937                            | 0.89  |
|                     | A_R28D <sub>C</sub> | 38,357                             | 5,084                            | 2.20  |
|                     | A_V29D <sub>C</sub> | 234,713                            | 23,767                           | 18.61 |
|                     | A_G33V <sub>C</sub> | 76,586                             | 4,021                            | 5.70  |
|                     | A_T38A <sub>C</sub> | 166,067                            | 16,901                           | 12.65 |
|                     | A_E40A <sub>C</sub> | 54,640                             | 3,681                            | 3.78  |
|                     | A_E40R <sub>C</sub> | 205,234                            | 12,382                           | 14.86 |
|                     | A_A41E <sub>C</sub> | 227,454                            | 22,677                           | 18.91 |
|                     | A_R42A <sub>C</sub> | 146,180                            | 13,993                           | 11.80 |
|                     | A_R42E <sub>C</sub> | 147,994                            | 14,863                           | 11.95 |
|                     | A_A45Y <sub>C</sub> | 115,337                            | 25,230                           | 9.10  |
|                     | A_A46Y <sub>C</sub> | 134,355                            | 15,617                           | 10.76 |
|                     | A_L52K <sub>C</sub> | 216,712                            | 30,479                           | 17.97 |
|                     | A_L52E <sub>C</sub> | 227,712                            | 21,544                           | 18.93 |
|                     | A_H53A <sub>C</sub> | 147,257                            | 8,522                            | 11.89 |
|                     | A_Y54A <sub>C</sub> | 190,128                            | 12,925                           | 13.69 |
|                     | A_Y54E <sub>C</sub> | 242,711                            | 5,871                            | 17.76 |
|                     | A_Y54R <sub>C</sub> | 210,400                            | 18,905                           | 15.26 |
|                     | A_E57A <sub>C</sub> | 155,862                            | 13,073                           | 11.81 |
|                     | A_K60A <sub>C</sub> | 234,490                            | 22,164                           | 18.27 |
| A_I61A <sub>C</sub> | 210,754             | 22,921                             | 16.32                            |       |
| A_Q63A <sub>C</sub> | 201,183             | 8,315                              | 15.53                            |       |
| A_A64Y <sub>C</sub> | 176,626             | 7,399                              | 13.51                            |       |
| A_E65A <sub>C</sub> | 165,484             | 14,097                             | 12.60                            |       |
| A_T67A <sub>C</sub> | 198,859             | 4,119                              | 15.34                            |       |

**Supplementary Figure 6.** Split-GFP analyses to study the interaction of GvpA (wild type and variants) with GvpF. The fluorescence was measured in LAU/mm<sup>2</sup> and the relative fluorescence was calculated according to Winter et al. (2018).

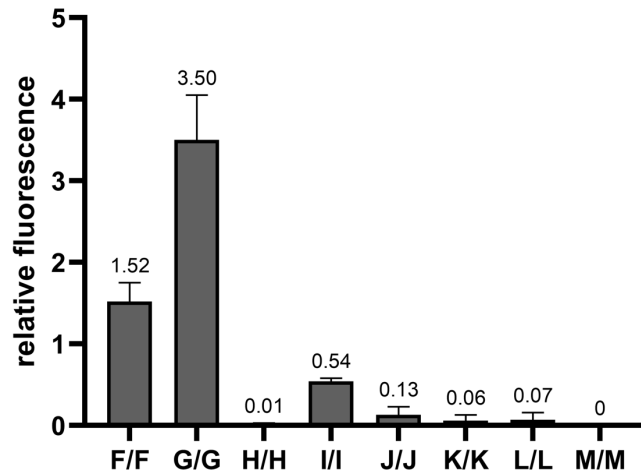

**Supplementary Figure 7.** Split-GFP analyses of the self-interaction of the accessory Gvp. The experimental data underlying these results are presented in supplemental Figure S8. The fluorescence was determined in LAU/mm<sup>2</sup>, and the rf-value was calculated. The numbers indicate the highest rf-value determined for each combination. Two biological and three technical replicates were investigated in each case.

| transformant   | LAU/mm <sup>2</sup> | $\sigma$<br>(LAU/mm <sup>2</sup> ) | Relative<br>fluorescence<br>(rf) | transformant | LAU/mm <sup>2</sup> | $\sigma$<br>(LAU/mm <sup>2</sup> ) | Relative<br>fluorescence<br>(rf) |        |      |
|----------------|---------------------|------------------------------------|----------------------------------|--------------|---------------------|------------------------------------|----------------------------------|--------|------|
| nF             | F <sub>c</sub>      | 25,436                             | 1,600                            | 0.62         | nJ                  | J <sub>c</sub>                     | 22,909                           | 1,095  | 0.09 |
|                | cF                  | 26,551                             | 2,647                            | 0.69         |                     | cJ                                 | 23,675                           | 2,053  | 0.13 |
| F <sub>N</sub> | F <sub>c</sub>      | 24,283                             | 7,001                            | 0.54         | J <sub>N</sub>      | J <sub>c</sub>                     | 20,952                           | 1,751  | 0.03 |
|                | cF                  | 39,650                             | 3,693                            | 1.52         |                     | cJ                                 | 23,908                           | 2,478  | 0.13 |
| nG             | G <sub>c</sub>      | 24,703                             | 2,459                            | 0.57         | nK                  | K <sub>c</sub>                     | 21,527                           | 1,432  | 0.04 |
|                | cG                  | 34,010                             | 2,683                            | 1.16         |                     | cK                                 | 21,520                           | 876    | 0.03 |
| G <sub>N</sub> | G <sub>c</sub>      | 62,546                             | 7,618                            | 3.50         | K <sub>N</sub>      | K <sub>c</sub>                     | 18,464                           | 928    | 0.00 |
|                | cG                  | 31,379                             | 5,645                            | 0.99         |                     | cK                                 | 21,915                           | 1,8748 | 0.06 |
| nH             | H <sub>c</sub>      | 15,347                             | 1,028                            | 0.00         | nL                  | L <sub>c</sub>                     | 21,801                           | 2,655  | 0.07 |
|                | cH                  | 13,819                             | 481                              | 0.00         |                     | cL                                 | 17,791                           | 2,033  | 0.02 |
| H <sub>N</sub> | H <sub>c</sub>      | 11,913                             | 1,197                            | 0.00         | L <sub>N</sub>      | L <sub>c</sub>                     | 17,853                           | 1,242  | 0.00 |
|                | cH                  | 15,227                             | 1,023                            | 0.01         |                     | cL                                 | 18,938                           | 1,212  | 0.01 |
| nI             | I <sub>c</sub>      | 20,631                             | 492                              | 0.54         | nM                  | M <sub>c</sub>                     | 14,432                           | 1,312  | 0.00 |
|                | cI                  | 12,156                             | 3,478                            | 0.08         |                     | cM                                 | 12,406                           | 936    | 0.00 |
| I <sub>N</sub> | I <sub>c</sub>      | 15,811                             | 281                              | 0.18         | M <sub>N</sub>      | M <sub>c</sub>                     | 14,378                           | 2,175  | 0.00 |
|                | cI                  | 16,820                             | 1,166                            | 0.26         |                     | cM                                 | 12,805                           | 835    | 0.00 |

**Supplementary Figure 8.** Split-GFP analyses to study the self-interaction of the different accessory Gvp proteins. The fluorescence was measured in LAU/mm<sup>2</sup> and the relative fluorescence calculated.
